# Supplementary material for: The Effect of Diet on Vascular Aging: A Narrative Review of the Available Literature
Source: MDPI journal article supplement (doi:10.3390/life14020267), 2024-02-17
Supplement: s1 [file s1]

## Contents

Supplementary Table S1. Search strategy for identifying studies on PubMed

Supplementary Table S1. Search strategy for identifying studies on PubMed

| Search | Query                                        | Results |
|--------|----------------------------------------------|---------|
| #1     | Mediterranean diet [MeSH]                    | 5446    |
| #2     | Mediterranean diet [tw]                      | 7879    |
| #3     | DASH diet [MeSH]                             | 421     |
| #4     | DASH diet [tw]                               | 846     |
| #5     | Dietary approaches to stop hypertension [tw] | 1355    |
| #6     | Vegetarian diet [MeSH]                       | 4175    |
| #7     | Vegetarian diet [tw]                         | 1482    |
| #8     | Vegan diet [tw]                              | 647     |
| #9     | Western diet [MeSH]                          | 1493    |
| #10    | Western diet [tw]                            | 4189    |
| #11    | Low fat diet [MeSH]                          | 4046    |
| #12    | Low fat diet [tw]                            | 4549    |
| #13    | Low-fat diet [tw]                            | 4549    |
| #14    | Low fat [tw]                                 | 13244   |
| #15    | Fat restricted [tw]                          | 4151    |
| #16    | Fat restricted diet* [tw]                    | 106     |
| #17    | Fat-restricted diet* [tw]                    | 106     |
| #18    | Reduced fat [tw]                             | 1907    |
| #19    | Low carbohydrate diet [MeSH]                 | 4425    |
| #20    | Low carbohydrate diet [tw]                   | 1679    |
| #21    | Low CHO diet [tw]                            | 79      |
| #22    | Carbohydrate restricted [tw]                 | 2341    |
| #23    | Carbohydrate restricted diet* [tw]           | 210     |
| #24    | Carbohydrate-restricted diet* [tw]           | 210     |
| #25    | Reduced carbohydrate [tw]                    | 285     |
| #26    | Energy restriction diet [MeSH]               | 8626    |

|                                                                 |                                       |        |
|-----------------------------------------------------------------|---------------------------------------|--------|
| #27                                                             | Energy restriction diet* [tw]         | 36     |
| #28                                                             | Energy restricted [tw]                | 1030   |
| #29                                                             | Calorie restriction diet [MeSH]       | 4716   |
| #30                                                             | Calorie restriction diet* [tw]        | 53     |
| #31                                                             | Calori* restricted [tw]               | 4102   |
| #32                                                             | Weight loss [tw]                      | 124254 |
| #33                                                             | #1-#32/OR                             | 170044 |
| #34                                                             | Vascular health [tw]                  | 2063   |
| #35                                                             | Arterial stiffness [MeSH]             | 8388   |
| #36                                                             | Arterial stiffness [tw]               | 12302  |
| #37                                                             | Endothelial function [MeSH]           | 686    |
| #38                                                             | Endothelial function [tw]             | 21357  |
| #39                                                             | Pulse wave velocity [MeSH]            | 6683   |
| #40                                                             | Pulse wave velocity [tw]              | 11826  |
| #41                                                             | Flow-mediated dilatation [MeSH]       | 168    |
| #42                                                             | Flow-mediated dilatation [tw]         | 2149   |
| #43                                                             | Augmentation index [MeSH]             | 15     |
| #44                                                             | Augmentation index [tw]               | 3545   |
| #45                                                             | Vascular aging [MeSH]                 | 16706  |
| #46                                                             | Vascular aging [tw]                   | 1268   |
| #47                                                             | Carotid intima media thickness [MeSH] | 6903   |
| #48                                                             | Carotid intima media thickness [tw]   | 11010  |
| #49                                                             | Carotid intima-media thickness [tw]   | 11010  |
| #50                                                             | cIMT [tw]                             | 4744   |
| #51                                                             | #34-#49/OR                            | 68045  |
| #52                                                             | #33 AND #51                           | 1123   |
| The last search was performed on December 27 <sup>th</sup> 2023 |                                       |        |
